# Supplementary material for: A mesoporous aluminosilicate prepared by simply coating fibrous γ-AlOOH on the external surface of SBA-15 for catalytic hydrocarbon cracking
Source: Royal Society of Chemistry journal article supplement (doi:10.1039/c6ra07467g), 2016-01-01
Supplement: c6ra07467g1.pdf [file c6ra07467g1.pdf]

## Electronic Supplementary Materials to:

### **A mesoporous aluminosilicate prepared by simply coating fibrous $\gamma$ - AlOOH on the external surface of SBA-15 for catalytic hydrocarbon cracking**

Zongbo Shi, Yejun Guan\*, Peng Wu, Mingyuan He\*

Shanghai Key Laboratory of Green Chemistry and Chemical Processes, School of Chemistry and  
Molecular Engineering, East China Normal University, North Zhongshan Rd. 3663, Shanghai  
200062, China

Fig. S1. Small- (left) and wide- (right) angle XRD patterns of the steamed Al<sub>2</sub>O<sub>3</sub> (a),  
steamed SBA-Al<sub>2</sub>O<sub>3</sub> (b), and steamed SBA/Al<sub>2</sub>O<sub>3</sub>-imp (c).

Fig. S2. NH<sub>3</sub>-TPD profiles of the catalysts before (solid line, top) and after (dash line,  
bottom) steaming at 800 °C for 4 h: Al<sub>2</sub>O<sub>3</sub> (a), SBA-Al<sub>2</sub>O<sub>3</sub> (b), and comparison  
SBA/Al<sub>2</sub>O<sub>3</sub>-imp sample (c).

Fig. S3. CO<sub>2</sub> evolution during TPO of the coked catalysts before (solid line, top) and  
after (dash line, bottom) steaming at 800 °C for 4 h: Al<sub>2</sub>O<sub>3</sub> (a), SBA-Al<sub>2</sub>O<sub>3</sub> (b), and  
SBA/Al<sub>2</sub>O<sub>3</sub>-imp (c).

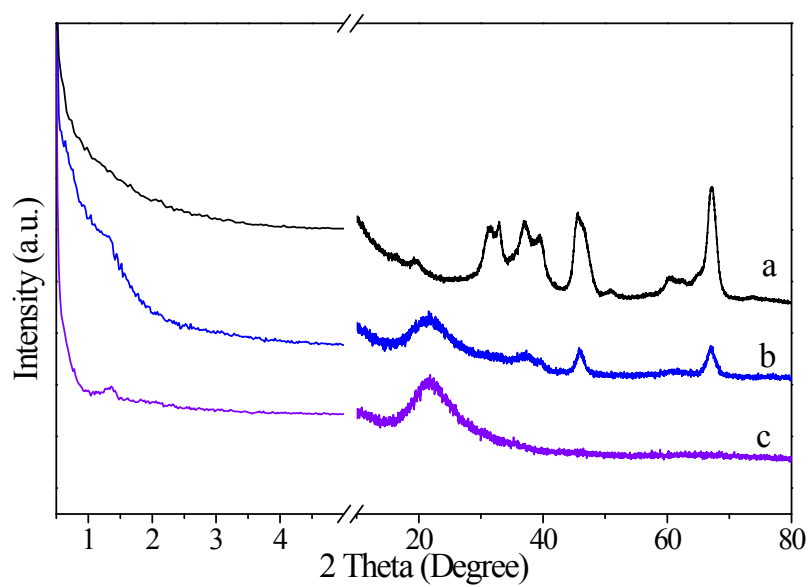

Fig. S1. Small- (left) and wide- (right) angle XRD patterns of the steamed  $\text{Al}_2\text{O}_3$  (a), steamed SBA- $\text{Al}_2\text{O}_3$  (b), and steamed SBA/ $\text{Al}_2\text{O}_3$ -imp (c).

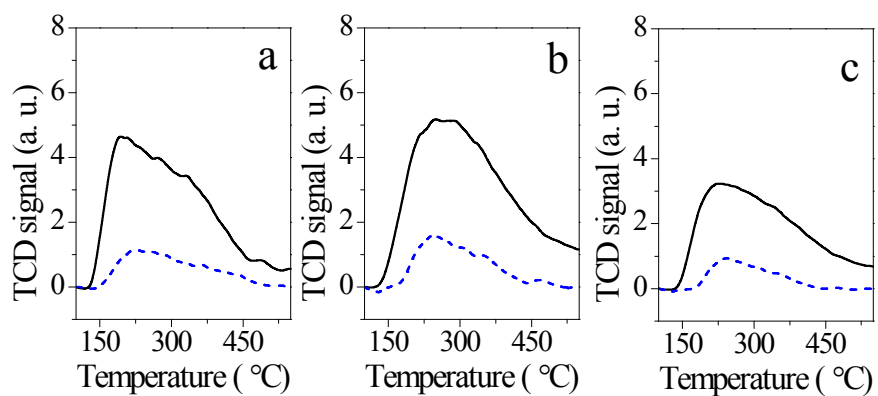

Fig. S2. NH<sub>3</sub>-TPD profiles of the catalysts before (solid line, top) and after (dash line, bottom) steaming at 800 °C for 4 h: Al<sub>2</sub>O<sub>3</sub> (a), SBA-Al<sub>2</sub>O<sub>3</sub> (b), and comparison SBA/Al<sub>2</sub>O<sub>3</sub>-imp sample (c).

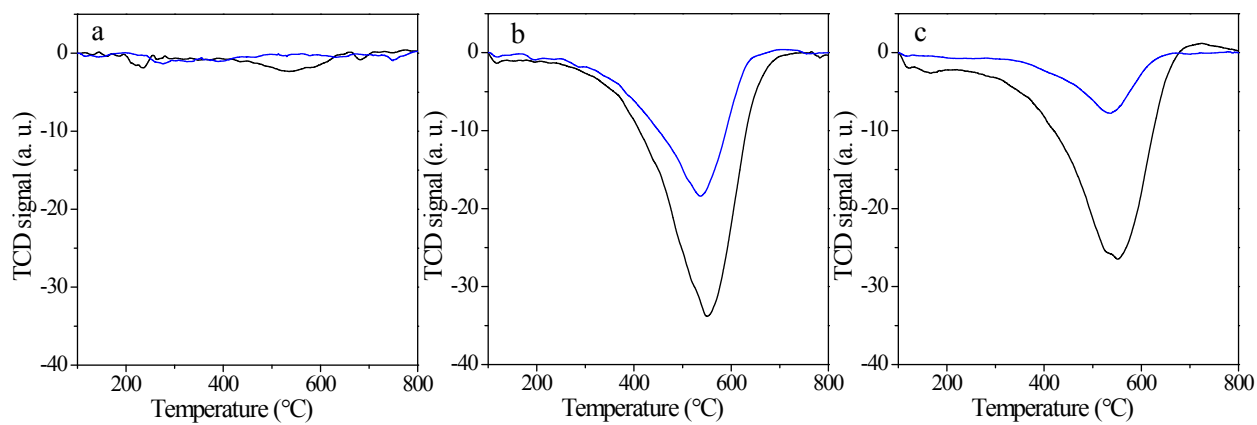

Fig. S3. CO<sub>2</sub> evolution during TPO of the coked catalysts before (solid line, top) and after (dash line, bottom) steaming at 800 °C for 4 h: Al<sub>2</sub>O<sub>3</sub> (a), SBA-Al<sub>2</sub>O<sub>3</sub> (b), and SBA/Al<sub>2</sub>O<sub>3</sub>-imp (c).
